1 A host–gut microbial co-metabolite of aromatic amino acids, *p*-cresol glucuronide, promotes  
2 blood–brain barrier integrity *in vivo*

3

4 Andrew V. Stachulski<sup>1</sup>, Tobias B-A Knausenberger<sup>2</sup>, Sita N. Shah<sup>2</sup>, Lesley Hoyles<sup>3</sup> & Simon  
5 McArthur<sup>2</sup>

6

7 <sup>1</sup> Robert Robinson Laboratories, Department of Chemistry, University of Liverpool, Liverpool,  
8 L69 7ZD, UK

9 <sup>2</sup> Institute of Dentistry, Faculty of Medicine & Dentistry, Queen Mary, University of London,  
10 Blizard Institute, 4, Newark Street, London, E1 2AT, UK

11 <sup>3</sup> Department of Bioscience, School of Science and Technology, Nottingham Trent University,  
12 Clifton, Nottingham, NG11 8NS, UK

13

14 \* Correspondence to Dr Andrew V. Stachulski ([stachuls@liverpool.ac.uk](mailto:stachuls@liverpool.ac.uk)), Prof Lesley Hoyles  
15 ([lesley.hoyles@ntu.ac.uk](mailto:lesley.hoyles@ntu.ac.uk)) or Dr Simon McArthur ([s.mcarthur@qmul.ac.uk](mailto:s.mcarthur@qmul.ac.uk))

16

17 Supplementary Materials are available from figshare: [https://figshare.com/projects/p-  
18 Cresol\\_glucuronide\\_promotes\\_blood\\_brain\\_barrier\\_integrity\\_in\\_vivo/130088](https://figshare.com/projects/p-Cresol_glucuronide_promotes_blood_brain_barrier_integrity_in_vivo/130088).

19

## 20 **Acknowledgements**

21 This work was funded by Alzheimer’s Research UK Pilot Grant No. ARUK-PPG2016B-6.  
22 PREDEASY™ efflux transporter analysis kits were generously provided through the SOLVO  
23 Biotechnology Research and Academic Collaborative Transporter Studies (ReACTS)  
24 Program. This work used the computing resources of the UK MEDical BIOinformatics  
25 partnership—aggregation, integration, visualisation and analysis of large, complex data (UK  
26 MED-BIO), which was supported by the Medical Research Council (grant number  
27 MR/L01632X/1). This project has received funding from the European Union’s Horizon 2020  
28 research and innovation programme under grant agreement No 874583. This publication  
29 reflects only the authors’ view and the European Commission is not responsible for any use  
30 that may be made of the information it contains.

31 **Abstract**

32 Purpose: The sequential activity of gut microbial and host processes can exert a powerful  
33 modulatory influence on dietary components, as exemplified by the metabolism of the amino  
34 acids tyrosine and phenylalanine to *p*-cresol by gut microbes, and then to *p*-cresol glucuronide  
35 (pCG) by host enzymes. Although such glucuronide conjugates are classically thought to be  
36 biologically inert, there is accumulating evidence that this may not always be the case. We  
37 investigated the activity of pCG, studying its interactions with the cerebral vasculature and the  
38 brain *in vitro* and *in vivo*. Methods: Male C57Bl/6J mice were used to assess blood–brain  
39 barrier (BBB) permeability and whole brain transcriptomic changes in response to pCG  
40 treatment. Effects were then further explored using the human cerebrovascular  
41 endothelial cell line hCMEC/D3, assessing paracellular permeability, transendothelial  
42 electrical resistance and barrier protein expression. Results: Mice exposed to pCG showed  
43 reduced BBB permeability and significant changes in whole brain transcriptome expression.  
44 Surprisingly, treatment of hCMEC/D3 cells with pCG had no notable effects until co-  
45 administered with bacterial lipopolysaccharide, at which point it was able to prevent the  
46 permeabilising effects of endotoxin. Further analysis suggested that pCG acts as an  
47 antagonist at the principal lipopolysaccharide receptor TLR4. Conclusion: The amino acid  
48 phase II metabolic product pCG is biologically active at the BBB, highlighting the complexity  
49 of gut microbe to host communication and the gut–brain axis.

50

51 **Keywords**

52 Blood-brain barrier, gut-brain axis, gut microbiota, glucuronidation

53

## 54 **Introduction**

55 That communication between the gut microbiota and the brain can occur is now well  
56 established, with increasing evidence indicating a central role for microbe-derived metabolites  
57 acting primarily through three routes: directly on enteric and gut extrinsic neural pathways, by  
58 modification of enteroendocrine signalling or, as we and others have shown, via the circulation  
59 and interactions with the blood–brain barrier (BBB) [1, 2]. Notably, while many microbe-derived  
60 metabolites circulate in their native form, many others are subjected to host metabolic enzyme-  
61 mediated biotransformation, thereby altering their biological activities.

62

63 A good example of this lies in the metabolism of the microbial product *p*-cresol. This molecule  
64 is produced by bacterial fermentation of dietary tyrosine and phenylalanine in the colon [3],  
65 and passes through the gut epithelium into the portal vasculature. Notably, *p*-cresol undergoes  
66 extensive conjugation both in enterocytes [4] and by hepatic enzymes upon reaching the liver  
67 [5], such that it is found as, predominantly, *p*-cresol sulfate (pCS) and *p*-cresol glucuronide  
68 (pCG) in the systemic circulation [6, 7]. While pCS has been extensively studied in light of its  
69 role as a major uraemic toxin [6], the potential biological actions of pCG have received far less  
70 attention.

71

72 Classically, glucuronidation is considered as part of the phase II metabolic pathways, with the  
73 actions of the numerous UDP-glucuronosyltransferases serving to enhance renal clearance  
74 of parent compounds [8]. More recent evidence suggests that this form of conjugation may  
75 not always be a neutralising process however, with a number of clinically relevant molecules,  
76 including morphine, codeine and ethanol being known to gain pharmacological activity upon  
77 glucuronide conjugation [9–11]. Whether the same can be said for microbe-derived  
78 compounds present in the circulation is unclear, with studies into this question hindered by  
79 difficulties in obtaining pure molecules for study. We have recently established a novel  
80 pathway for chemical synthesis of pCG, and here we employ a combined *in vitro/in vivo*  
81 approach to identify the actions of this compound on the cerebral vasculature and the brain.

82

## 83 **Materials & Methods**

### 84 *Drugs & Reagents*

85 Trimethylsilyltrifluoromethanesulfonate was purchased from Fluorochem Ltd. UK and methyl  
86 1,2,3,4-tetra-O-acetyl- $\beta$ -D-glucuronate from Carbosynth UK. Solvents were of minimum HPLC  
87 grade and were purchased from Fisher Scientific UK. Ultrapure lipopolysaccharide (LPS) from  
88 *Porphyromonas gingivalis* was purchased from InvivoGen (Toulouse, France). Evans blue, 70  
89 kDa FITC-dextran and MTT (3-(4,5-dimethylthiazol-2-yl)-2,5-diphenyltetrazolium bromide)  
90 were purchased from Merck Life Science UK Ltd., UK.

91

### 92 *Animals*

93 Wild-type male C57Bl/6J mice aged between 7 and 8 weeks (Charles River UK Ltd., Margate,  
94 UK) were used for all experiments. Mice were kept under a 12 h:12 h light:dark regime, with  
95 *ad libitum* access to standard chow and drinking water; all animals were acclimatised to the  
96 holding facility environment for one week prior to experimentation. Animals were treated as  
97 described below and killed by transcardial perfusion with ice-cold saline under pentobarbitone  
98 anaesthesia. All experiments were approved by the QMUL Animal Welfare and Ethical Review  
99 Board and were performed in accordance with the UK Animals (Scientific Procedures) Act,  
100 1986, under Project Licence PFA5C4F4F.

101

### 102 *In vivo BBB permeability analysis*

103 Mice (n=5-6 per group) were injected i.p. with 1 mg/kg body weight pCG in 100  $\mu$ l saline  
104 vehicle, a dose calculated to approximately double circulating concentrations [12], followed 2  
105 h or 6 h later by assessment of Evans blue extravasation. One hour before assessment  
106 animals were injected i.p. with 100  $\mu$ l of a 2% (w/v) solution of Evans blue dye in 0.9 % saline.  
107 Dye was permitted to circulate for 1 h before animals were transcardially perfused with 0.9%  
108 saline at 4 °C to remove dye remaining in the vasculature. Blood samples were allowed to  
109 coagulate at 37 °C for 15 minutes prior to centrifugation at 800 g for 10 minutes to separate  
110 serum. Brains were removed and homogenized by maceration in 0.1 M phosphate-buffered  
111 saline. Suspended macromolecules were precipitated by incubation with 60% trichloroacetic  
112 acid, and dye content of resulting supernatants was detected using a CLARIOstar  
113 spectrophotometer (BMG Labtech GmbH, Germany) alongside a standard curve of defined  
114 concentrations of Evans blue in the same buffer. Brain Evans' blue content was expressed as  
115  $\mu$ g of dye per mg of brain tissue, normalized to circulating serum concentrations.

116

### 117 *RNAseq data analyses*

118 Processing of mouse brain samples (taken at 2 h) and RNA extraction were performed as  
119 described previously [2]. RNA samples (n=6 pCG, n=6 control) were sent to MacroGen Inc.

120 (Seoul, Republic of Korea) where they were subject to quality checks (RIN analysis); libraries  
121 were prepared (TruSeq Stranded mRNA LT Sample Prep Kit) for paired-end (2x 100 nt)  
122 sequencing on an Illumina HiSeq 4000 apparatus. Three pCG-treated and three saline  
123 controls produced data of poor quality so were excluded from analyses after quality checks  
124 and consideration of Macrogen quality reports; as such, samples SG1, SG3, SG5, CG2, CG5  
125 and CG6 were used for all analyses described from hereon. Raw RNAseq (fastq) sequence  
126 data were processed in house as described previously [2]. Entrez gene identifiers were  
127 converted to gene symbols using *Mus musculus* annotations downloaded from NCBI on 4  
128 January 2021; only those genes with valid Entrez gene identifiers were retained in analyses.  
129 Significantly differentially expressed genes (FDR  $P < 0.05$ ) identified using DESeq2 v1.22.1  
130 [13] were analysed by mouse KEGG pathway over-representation analysis using Enrichr [14,  
131 15] and manual curation. Signaling Pathway Impact Analysis (SPIA v 1.22.1) [16] was used  
132 to determine whether Kyoto Encyclopedia of Genes and Genomes (KEGG) *Mus musculus*  
133 pathways (downloaded on 22 December 2021) were activated or inhibited in mouse brain cells  
134 exposed to pCG. RNAseq data have been deposited in ArrayExpress under accession number  
135 E-MTAB-11340. Normalized and log<sub>2</sub>-transformed RNAseq data are available as  
136 [Supplementary Material](#) (Supplementary Table 1).

137

#### 138 *Cell culture*

139 The human cerebromicrovascular endothelial cell line hCMEC/D3 was maintained and treated  
140 as described previously [17]. Cells were cultured to confluency in complete endothelial cell  
141 growth medium MV2 (PromoCell GmbH, Germany), whereupon VEGF was removed and cells  
142 were further cultured for a minimum of 4 days to enable intercellular tight junction formation  
143 prior to experimentation. All cell cultures were used below passage 35 to ensure retention of  
144 appropriate endothelial characteristics [18].

145

#### 146 *Cell survival analysis*

147 The potential for pCG-induced cytotoxicity was assessed using the MTT assay. Briefly, cells  
148 were treated with pCG for 24 h, prior to administration of MTT at 500 µg/ml. Cells were  
149 incubated at 37 °C for 2 h, medium was removed and resulting crystals were solubilised by  
150 incubation for 2 minutes in dimethyl sulfoxide. Absorbance was read at 540 nm using a  
151 CLARIOstar spectrophotometer (BMG Labtech, Ortenberg, Germany), with a reference  
152 wavelength at 570 nm.

153

#### 154 *In vitro barrier function assessments*

155 Paracellular permeability and transendothelial electrical resistance were measured on 100%  
156 confluent cultures polarised by growth on 24-well plate polyethylene terephthalate (PET)

157 transwell inserts (surface area: 0.33 cm<sup>2</sup>, pore size: 0.4 μm; Appleton Woods, UK) previously  
158 coated with calf-skin collagen (15 μg/cm<sup>2</sup> and fibronectin 3 μg/cm<sup>2</sup>; both Merck Life Science  
159 UK Ltd.). The permeability of hCMEC/D3 cell monolayers to 70 kDa FITC-dextran (2 mg/ml)  
160 was measured as described previously [19, 20]. Transendothelial electrical resistance (TEER)  
161 measurements were performed using a Millicell ERS-2 Voltohmmeter (Millipore, Watford, UK)  
162 and were expressed as Ω.cm<sup>2</sup>. In all cases, values obtained from cell-free inserts similarly  
163 coated with collagen and fibronectin were subtracted from the total values.

164

#### 165 *Immunofluorescence*

166 Confluent hCMEC/D3 monolayers grown on transwell inserts as described above were fixed  
167 by immersion in 2% formaldehyde in 0.1 M PBS for 10 minutes at room temperature. Cells  
168 were immunostained according to standard protocols [21] using a primary rabbit anti-human  
169 antibody directed against zona occludens-1 (ZO-1; 1:100, Thermo-Fisher Scientific, UK) and  
170 a AF488-conjugated secondary goat anti-rabbit antibody (1:500, ThermoFisher Scientific, UK)  
171 or AF488-conjugated phalloidin (100 nM; Cytoskeleton Inc., Denver, USA). Nuclei were  
172 counterstained with DAPI (50 ng/ml; Merck Life Science UK Ltd., UK). Images were captured  
173 using an LSM880 confocal laser scanning microscope (Carl Zeiss Ltd., Cambridge, UK) fitted  
174 with 405 nm and 488 nm lasers and a 63x oil immersion objective lens (NA, 1.4 mm, working  
175 distance, 0.17 mm). Images were captured with ZEN imaging software (Carl Zeiss Ltd., UK)  
176 and analysed using ImageJ 1.53c (National Institutes of Health, USA).

177

#### 178 *Flow cytometry*

179 Cells were labelled with APC-conjugated mouse monoclonal anti-CD11b (Biolegend, UK),  
180 FITC-conjugated mouse monoclonal anti-CD14 (Biolegend, UK), FITC-conjugated mouse  
181 monoclonal anti-MD2 (Biolegend, UK), PE-conjugated mouse monoclonal anti-TLR4, APC-  
182 conjugated mouse monoclonal anti-BCRP (BD Biosciences, Oxford, UK), or PE-conjugated  
183 mouse monoclonal anti-MDR1A (BD Biosciences, UK), for analysis by flow cytometry. Briefly,  
184 cells were treated as described below and, in the case of hCMEC/D3 cells, detached using  
185 0.05% trypsin and incubated with antibodies for 20 minutes at 4 °C. Immunofluorescence was  
186 analysed for 10,000 events per treatment using a BD FACS Canto II flow cytometer (BD  
187 Biosciences, UK), and data were analysed using FlowJo 8.0 software (Treestar Inc., CA, USA).

188

#### 189 *Efflux transporter assays*

190 Activity of the major efflux transporters P-glycoprotein and BCRP was determined using  
191 commercially available assays (PREDEASY™ ATPase Assay Kits, Solvo Biotechnology Inc.,  
192 Budapest, Hungary), performed according to the manufacturer's instructions. Stepwise dose-  
193 response curves centred around reported physiological circulating concentrations of pCG

194 (12.3 nM – 27  $\mu$ M) were constructed (n = 4) to investigate stimulatory and inhibitory effects  
195 upon transporter activity.

196

197 *Statistical analysis*

198 Sample sizes were calculated to detect differences of 15% or more with a power of 0.85 and  
199  $\alpha$  set at 5%, calculations being informed by previously published data [2, 17]. Experimental  
200 data are expressed as mean  $\pm$  SEM, with n = 6-9 independent experiments for all studies. In  
201 all cases, normality of distribution was established using the Shapiro–Wilk test, followed by  
202 analysis with two-tailed Student’s *t*-tests to compare two groups or, for multiple comparison  
203 analysis, one- or two-way ANOVA followed by *post hoc* analysis by either Dunnett’s test (for  
204 dose-response experiments) or Tukey’s HSD test (all other comparisons). A P value of less  
205 than or equal to 5% was considered significant.

206



## 207 **Results**

### 208 *Synthesis of p-cresol glucuronide*

209 As previously described [22] and shown schematically (Fig. 1A), reaction of *p*-cresol **1** with  
210 1,2,3,4-tetra-O-acetyl- $\beta$ -D-glucuronate **2** in  $\text{CH}_2\text{Cl}_2$  promoted by  
211 trimethylsilyltrifluoromethanesulfonate afforded the conjugate **3** in very good yield as a single  
212  $\beta$ -anomer. Hydrolysis of **3** under mild conditions (aq.  $\text{Na}_2\text{CO}_3$ , MeOH) afforded the desired  
213 glucuronide sodium salt **4** after partial neutralisation to pH 6. Recrystallisation gave material  
214 of microanalytical purity, as indicated by the  $^1\text{H}$  NMR spectrum (Fig. 1B).

215

### 216 *pCG modulates BBB integrity and the whole brain transcriptome in vivo*

217 A defining property of the cerebral vasculature is the existence of a tight barrier function  
218 limiting passage of soluble molecules into the brain parenchyma, the BBB. We examined  
219 whether exposure to increased levels of pCG could affect BBB integrity *in vivo*, assessed by  
220 monitoring extravasation of administered Evans blue dye into the brain tissue. Treatment of  
221 mice with 1 mg/kg pCG i.p. (a dose known to approximately double baseline serum  
222 concentrations [23]) caused a significant reduction in entry of Evans blue to the brain tissue,  
223 by approximately 50% within 6 h of treatment (Fig. 2A).

224

225 To investigate the mechanism(s) underlying this action of pCG, we performed bulk RNAseq  
226 analysis of brain tissue from animals treated for 2 h with 1 mg/kg pCG i.p., identifying 7702  
227 significantly differentially expressed genes (Fig. 2B; Supplementary Table 2), of which 1658  
228 and 1433 showed greater than 2-fold up- or down-regulation respectively following correction  
229 for multiple testing (Fig. 2C). Analysis of gene ontology categories over-represented within  
230 these gene sets using Enrichr [14, 15, 24] identified a number of different biological process  
231 ontologies exhibiting significant changes (Fig. 2D), with ontologies relating to axon generation  
232 and extracellular matrix organisation being notably up-regulated, while pathways associated  
233 with protein synthesis and ribosomal activity were down-regulated. SPIA of all differentially  
234 expressed genes revealed several significantly over-represented KEGG pathways (Suppl. Fig.  
235 2A), notably indicating pathways associated with growth factor/transcription factor signalling  
236 and the response to infection as being activated, whilst pathways associated with cellular  
237 degradation and metabolism were inhibited (Suppl. Fig. 2B).

238

239 To specifically examine the interactions of pCG with the BBB, we further interrogated  
240 transcriptomic changes induced by pCG treatment by comparison with a defined list of 203  
241 known BBB-relevant genes [17], identifying a total of 78 upregulated and 24 down-regulated  
242 number of genes exhibiting statistically significant regulation (Fig. 2E; Supplementary Table



243 3). Examination of associated biological process gene ontologies here identified clear  
244 upregulation in multiple transport pathways and suppression of inflammatory processes (Fig.  
245 2F). Individual gene-level analysis of differentially expressed transporter systems identified  
246 enhanced expression of a wide range of nutrient uptake transporters, whereas in contrast only  
247 the transporters for myo-inositol and transferrin and aquaporin-4 were significantly down-  
248 regulated (Table 1).

249

250 *pCG has limited direct effects upon an in vitro model of the BBB*

251 Following these *in silico* analyses, we sought to investigate the biological pathway(s) through  
252 which pCG affected the BBB, using a well-established model of the human brain capillary  
253 endothelium, the hCMEC/D3 cell line [25]. Initial assessment of potential pCG toxicity using  
254 the MTT assay showed no effects on cell survival following 24 h treatment of hCMEC/D3 cells  
255 with concentrations of up to 100  $\mu$ M pCG (Fig. 3A). Similarly, as  $\beta$ -glucuronidase is known to  
256 be present in the cerebral endothelium, albeit at low levels [26], it is plausible that the effects  
257 of pCG may be caused by reversion to its parent *p*-cresol molecule. However, exposure of  
258 hCMEC/D3 cells to *p*-cresol itself (5  $\mu$ M, 24 h) caused a significant increase in paracellular  
259 permeability to a 70 kDa FITC-dextran tracer and accompanying reduction in transendothelial  
260 electrical resistance (Suppl. Fig. 1), indicating an abrogation of BBB integrity, essentially the  
261 opposite of our *in vivo* findings.

262

263 We then examined the ability of pCG itself to affect hCMEC/D3 monolayer barrier integrity.  
264 Exposure of hCMEC/D3 cells for 24 h to pCG caused a dose-dependent increase in  
265 transendothelial electrical resistance, becoming statistically significant with 10  $\mu$ M and 100  $\mu$ M  
266 concentrations (Fig. 3B), but this was not accompanied by any change in permeability to the  
267 70 kDa FITC-dextran tracer (Fig. 3C). Microscopic examination of the tight junction component  
268 ZO-1 and the actin cytoskeleton similarly revealed little effect of pCG upon the endothelial  
269 cells (Fig. 3D).

270

271 As our transcriptomic data indicated upregulation of multiple nutrient uptake transporter  
272 genes, we investigated whether pCG could also affect two of the principal efflux transport  
273 systems of the BBB, namely P-glycoprotein and BCRP. While pCG had no effect on cell  
274 surface P-glycoprotein expression at any dose tested (Fig. 3E), exposure of cells to 100  $\mu$ M  
275 pCG did cause a slight, but significant reduction in BCRP expression (Fig. 3H). Neither  
276 transporter was activated or inhibited by the presence of pCG at any concentrations tested  
277 (Fig. 3F-G, I-J).

278

279 *pCG antagonises the BBB-permeabilising actions of bacterial LPS*

280 In light of the contrast between the limited effects of pCG seen in our *in vitro* BBB model, we  
281 sought alternative explanations for the more pronounced effects of the metabolite seen *in vivo*,  
282 taking a lead from the indicated suppression of inflammatory process ontologies. Several  
283 structurally dissimilar glucuronidated molecules interact with the bacterial LPS receptor TLR4  
284 and its heterodimeric partner MD-2, including morphine-3-glucuronide [27], ethyl glucuronide  
285 [9] and a range of steroid hormone glucuronide conjugates [28], leading us to hypothesise that  
286 this may also be the case for pCG. LPS is known to circulate at low, but non-zero, levels in  
287 normal mice and humans [29, 30], and is known to enhance BBB permeability *in vitro* and *in*  
288 *vivo* [2], hence we investigated the interaction between it and pCG in our model system.

289  
290 We initially confirmed that hCMEC/D3 cells express TLR4 and its accessory proteins MD-2  
291 and CD14 (Suppl. Fig. 3A-C). Treatment of hCMEC/D3 cells with LPS (*Porphyromonas*  
292 *gingivalis*, 10 ng/ml, 24 h) significantly enhanced paracellular permeability to a 70 kDa FITC-  
293 dextran tracer (Fig. 4A) and reduced transendothelial electrical resistance (Fig. 4B), effects  
294 that were both prevented by 30 minutes pre-treatment with pCG (1  $\mu$ M). Similar treatment of  
295 endothelial monolayers with LPS disrupted circumferential localisation of the key tight junction  
296 molecule ZO-1 (Fig. 4C) and induced the appearance of large numbers of cytosolic actin fibres  
297 (Fig. 4D), both of which features were prevented by 30 minutes pre-treatment with pCG (1  
298  $\mu$ M). This effect did not appear to be due to down-regulation of TLR4 or its accessory  
299 molecules CD14 or MD-2 on the surface of the endothelial cells (Fig. 4E-G), suggesting pCG  
300 may be acting as an antagonist at this receptor.

301  
302 To provide further support for this hypothesis, we investigated whether pCG could functionally  
303 antagonise an alternative and unrelated effect of LPS treatment, upregulation of surface  
304 expression of the integrin CD11b on the human monocyte cell line THP-1 (Suppl. Fig. 3).  
305 Treatment of THP-1 cells with LPS (20 ng/ml, 24h) significantly up-regulated surface CD11b  
306 expression, an effect prevented by 30 minutes pre-treatment with 1  $\mu$ M pCG (Fig. 4G),  
307 confirming the ability of pCG to antagonise LPS-induced signalling responses in distinct  
308 circumstances.

309

## 310 Discussion

311 Glucuronidation is a key stage in phase II metabolism and clearance of endogenous and  
312 exogenous molecules and has long been investigated in this regard. Much is now known about  
313 the various UDP-glucuronosyltransferases responsible for glucuronidation at different sites in  
314 the body [8], but the biological actions of glucuronide compounds once they have been formed  
315 are rather less understood. In most cases, glucuronide conjugates have been considered as  
316 biologically inactive and simply destined for renal elimination, but our data add to the steadily  
317 building picture that this may not be universally true. Notably, glucuronide derivatives of  
318 morphine, ethanol and estradiol have been shown to act as agonists of the TLR4 complex,  
319 promoting allodynia and inflammation upon spinal cord administration [9, 27, 28]. Our data  
320 add the tyrosine/phenylalanine metabolite pCG to the list of glucuronide conjugates that can  
321 interact with TLR4 signalling, but with the marked difference that, in contrast to the other  
322 known activating agents, pCG is a functional antagonist and prevents the permeabilising  
323 effects of bacterial endotoxin exposure upon the BBB.

324

325 Whilst pCG has long been known to circulate in the blood, its physiological and potentially  
326 pathological actions have remained somewhat elusive. Our description of an antagonistic  
327 action of pCG upon the principal LPS receptor, the TLR4 complex, indicates an anti-  
328 inflammatory effect of the molecule and suggests that it may, at least at physiological  
329 concentrations, aid cerebrovascular resilience to the damaging effects of LPS exposure [21,  
330 31], thereby protecting against the development of sickness behaviours [32]. However, pCG  
331 is also well known as a potential uraemic toxin [33]. Exposure at levels seen in patients  
332 undergoing haemodialysis has been reported to directly evoke a low level of endothelial  
333 reactive oxygen species release [34], to impair endothelial succinate dehydrogenase function  
334 [35] and to potentiate some of the inflammatory effects of pCS upon leukocytes [36] and the  
335 endothelium [37]. Notably, individuals with renal dysfunction have increased susceptibility to  
336 bacterial infection [38–40] despite the presence of chronic low grade leukocyte activation [41].  
337 Given that the majority of circulating pCG in such patients is freely available [42] and thus  
338 presumably able to interact with TLR4, the potential contribution that such antagonism by pCG  
339 makes to masking signs of bacterial infection bears further investigation.

340

341 Beyond emphasising the need to look again at glucuronide conjugates as potential biological  
342 actors, our data also highlight the position of the cerebral vasculature and the BBB as targets  
343 for the actions of microbial metabolites and an important aspect of the gut–brain axis. A range  
344 of gut microbe-derived metabolites, including short-chain fatty acids, methylamines and, here,  
345 cresols, have now been shown to regulate BBB integrity [1, 2, 17] *in vivo*. That such structurally  
346 diverse molecules can modulate BBB function epitomises the complexity of the gut

347 microbiome–brain axis, but also emphasises the importance of systematic investigation of this  
348 communication pathway. Moreover, as pCG is a product of both gut microbial and host  
349 enzymatic co-metabolism of aromatic amino acids, our data emphasise the need to consider  
350 both microbial and host systems in regulating gut microbe–brain communication. With over  
351 200 known microbe-derived metabolites present in the human circulation [43], there is clearly  
352 much still to learn about how they might influence the cerebral vasculature and their  
353 implications for health, ageing and disease.

354

355 A notable feature of the gut microbiota is its exquisite sensitivity to dietary change [44], with  
356 the make-up of the gut microbiome changing in a matter of weeks of exposure to a novel diet  
357 [45]. As diet is also known to be a major risk factor for cerebrovascular and neurological health  
358 [46], studying the links between diet, gut microbe–host co-metabolites and the BBB may be  
359 instructive in understanding the pathogenesis of and, potentially, treatment for neurovascular  
360 disease. In particular, our study of the simple phenolic glucuronide pCG may be of relevance  
361 when it comes to understanding the actions of its more chemically complex relatives, the  
362 dietary polyphenol glucuronides. Diets supplemented with foods containing polyphenols have  
363 been shown to improve cerebral blood flow and neurovascular coupling in humans [47–51],  
364 and rodent studies have revealed polyphenols to protect against ischaemia or trauma-induced  
365 BBB integrity damage [52–55]. Notably, however, such dietary polyphenols are primarily found  
366 in the circulation as conjugates: sulfates, methylates, and, conspicuously, glucuronides [56].  
367 At the least, the presence of high levels of glucuronide conjugates suggest that these agents  
368 should be investigated as potential mediators of the beneficial effects of dietary polyphenols  
369 upon the cerebral vasculature.

370

### 371 *Conclusion*

372 Here, we show that pCG, thought to be a relatively inert product of gut microbe–host enzyme  
373 co-metabolism, can influence the BBB and potentially immune cell activity through functional  
374 antagonism at the TLR4 complex. This adds to our understanding of the role of glucuronide  
375 conjugates as not only targets for renal elimination, but also as potent biological actors in their  
376 own right. Moreover, our data emphasise the importance of considering both microbial and  
377 host metabolic processes in understanding the mechanism(s) of communication that underlie  
378 the gut microbiota–brain axis.

379

380 **Statements & Declarations**

381 The authors have no competing interests to declare that are relevant to the content of this  
382 article. Author Contributions: AVS prepared and purified pCG, TBAK, SNS & SM performed  
383 cell culture and animal experiments, LH performed bioinformatic analyses. AVS, LH & SM  
384 wrote the manuscript. All authors have read and approved the final version of the manuscript.  
385

## 386 References

387

- 388 1. Braniste V, Al-Asmakh M, Kowal C, et al (2014) The gut microbiota influences blood-  
389 brain barrier permeability in mice. *Sci Transl Med* 6:263ra158-263ra158.  
390 <https://doi.org/10.1126/scitranslmed.3009759>
- 391 2. Hoyles L, Pontifex MG, Rodriguez-Ramiro I, et al (2021) Regulation of blood-brain  
392 barrier integrity by microbiome-associated methylamines and cognition by  
393 trimethylamine N-oxide. *Microbiome* 9:235. [https://doi.org/10.1186/S40168-021-](https://doi.org/10.1186/S40168-021-01181-Z)  
394 [01181-Z](https://doi.org/10.1186/S40168-021-01181-Z)
- 395 3. Saito Y, Sato T, Nomoto K, Tsuji H (2018) Identification of phenol- and p-cresol-  
396 producing intestinal bacteria by using media supplemented with tyrosine and its  
397 metabolites. *FEMS Microbiol Ecol* 94:125. <https://doi.org/10.1093/femsec/fiy125>
- 398 4. Ramakrishna BS, Gee D, Weiss A, et al (1989) Estimation of phenolic conjugation by  
399 colonic mucosa. *J Clin Pathol* 42:620–623. <https://doi.org/10.1136/jcp.42.6.620>
- 400 5. Rong Y, Kiang TKL (2020) Characterizations of human udp-glucuronosyltransferase  
401 enzymes in the conjugation of p-cresol. *Toxicol Sci* 176:285–296.  
402 <https://doi.org/10.1093/toxsci/kfaa072>
- 403 6. Gryp T, Vanholder R, Vaneechoutte M, Glorieux G (2017) P-Cresyl Sulfate. *Toxins*  
404 (Basel) 9:52. <https://doi.org/10.3390/toxins9020052>
- 405 7. Vanholder R, De Smet R, Lesaffer G (1999) p-Cresol: A toxin revealing many neglected  
406 but relevant aspects of uraemic toxicity. *Nephrol. Dial. Transplant.* 14:2813–2815
- 407 8. Yang N, Sun R, Liao X, et al (2017) UDP-glucuronosyltransferases (UGTs) and their  
408 related metabolic cross-talk with internal homeostasis: A systematic review of UGT  
409 isoforms for precision medicine. *Pharmacol. Res.* 121:169–183
- 410 9. Lewis SS, Hutchinson MR, Zhang Y, et al (2013) Glucuronic acid and the ethanol  
411 metabolite ethyl-glucuronide cause toll-like receptor 4 activation and enhanced pain.  
412 *Brain Behav Immun* 30:24–32. <https://doi.org/10.1016/j.bbi.2013.01.005>
- 413 10. Klimas R, Mikus G (2014) Morphine-6-glucuronide is responsible for the analgesic  
414 effect after morphine administration: a quantitative review of morphine, morphine-6-  
415 glucuronide, and morphine-3-glucuronide. *Br J Anaesth* 113:935–944.  
416 <https://doi.org/10.1093/bja/aeu186>
- 417 11. Srinivasan V, Wielbo D, Tebbett IR (1997) Analgesic effects of codeine-6-glucuronide  
418 after intravenous administration. *Eur J Pain* 1:185–190. [https://doi.org/10.1016/s1090-](https://doi.org/10.1016/s1090-3801(97)90103-8)  
419 [3801\(97\)90103-8](https://doi.org/10.1016/s1090-3801(97)90103-8)
- 420 12. Koppe L, Alix PM, Croze ML, et al (2017) P-Cresyl glucuronide is a major metabolite of  
421 p-cresol in mouse: In contrast to p-cresyl sulphate, p-cresyl glucuronide fails to promote  
422 insulin resistance. *Nephrol Dial Transplant* 32:2000–2009.

- 423 <https://doi.org/10.1093/ndt/gfx089>
- 424 13. Love MI, Huber W, Anders S (2014) Moderated estimation of fold change and  
425 dispersion for RNA-seq data with DESeq2. *Genome Biol* 15:550europ.  
426 <https://doi.org/10.1186/s13059-014-0550-8>
- 427 14. Chen EY, Tan CM, Kou Y, et al (2013) Enrichr: Interactive and collaborative HTML5  
428 gene list enrichment analysis tool. *BMC Bioinformatics* 14:128.  
429 <https://doi.org/10.1186/1471-2105-14-128>
- 430 15. Kuleshov M V., Jones MR, Rouillard AD, et al (2016) Enrichr: a comprehensive gene  
431 set enrichment analysis web server 2016 update. *Nucleic Acids Res* 44:W90–W97.  
432 <https://doi.org/10.1093/nar/gkw377>
- 433 16. Tarca AL, Draghici S, Khatri P, et al (2009) A novel signaling pathway impact analysis.  
434 *Bioinformatics* 25:75–82. <https://doi.org/10.1093/bioinformatics/btn577>
- 435 17. Hoyles L, Snelling T, Umlai UK, et al (2018) Microbiome–host systems interactions:  
436 Protective effects of propionate upon the blood–brain barrier. *Microbiome* 6:55.  
437 <https://doi.org/10.1186/s40168-018-0439-y>
- 438 18. Weksler BB, Subileau EA, Perrière N, et al (2005) Blood-brain barrier-specific  
439 properties of a human adult brain endothelial cell line. *FASEB J* 19:1872–4.  
440 <https://doi.org/10.1096/fj.04-3458fje>
- 441 19. Abbott NJ, Hughes CCW, Revest PA, Greenwood J (1992) Development and  
442 characterisation of a rat brain capillary endothelial culture: Towards an in vitro blood-  
443 brain barrier. *J Cell Sci* 103:23–37. <https://doi.org/10.1242/jcs.103.1.23>
- 444 20. Coisne C, Dehouck L, Faveeuw C, et al (2005) Mouse syngenic in vitro blood-brain  
445 barrier model: A new tool to examine inflammatory events in cerebral endothelium. *Lab*  
446 *Investig* 85:734–746. <https://doi.org/10.1038/labinvest.3700281>
- 447 21. Maggioli E, McArthur S, Mauro C, et al (2016) Estrogen protects the blood–brain barrier  
448 from inflammation-induced disruption and increased lymphocyte trafficking. *Brain*  
449 *Behav Immun* 51:212–222. <https://doi.org/10.1016/j.bbi.2015.08.020>
- 450 22. London JA, Wang ECS, Barsukov IL, et al (2021) Synthesis and toxicity profile in 293  
451 human embryonic kidney cells of the  $\beta$  D-glucuronide derivatives of ortho-, meta- and  
452 para-cresol. *Carbohydr Res* 499:108225–108230.  
453 <https://doi.org/10.1016/j.carres.2020.108225>
- 454 23. Koppe L, Alix PM, Croze ML, et al (2017) P-Cresyl glucuronide is a major metabolite of  
455 p-cresol in mouse: In contrast to p-cresyl sulphate, p-cresyl glucuronide fails to promote  
456 insulin resistance. *Nephrol Dial Transplant* 32:2000–2009.  
457 <https://doi.org/10.1093/ndt/gfx089>
- 458 24. Xie Z, Bailey A, Kuleshov M V., et al (2021) Gene Set Knowledge Discovery with  
459 Enrichr. *Curr Protoc* 1:e90. <https://doi.org/10.1002/cpz1.90>



- 460 25. Weksler B, Romero IA, Couraud P-O (2013) The hCMEC/D3 cell line as a model of the  
461 human blood brain barrier. *Fluids Barriers CNS* 10:16. [https://doi.org/10.1186/2045-](https://doi.org/10.1186/2045-8118-10-16)  
462 8118-10-16
- 463 26. Sjöstedt E, Zhong W, Fagerberg L, et al (2020) An atlas of the protein-coding genes in  
464 the human, pig, and mouse brain. *Science* (80- ) 367:eaay5947.  
465 <https://doi.org/10.1126/science.aay5947>
- 466 27. Lewis SS, Hutchinson MR, Rezvani N, et al (2010) Evidence that intrathecal morphine-  
467 3-glucuronide may cause pain enhancement via toll-like receptor 4/MD-2 and  
468 interleukin-1 $\beta$ . *Neuroscience* 165:569–583.  
469 <https://doi.org/10.1016/j.neuroscience.2009.10.011>
- 470 28. Lewis SS, Hutchinson MR, Frick MM, et al (2015) Select steroid hormone glucuronide  
471 metabolites can cause toll-like receptor 4 activation and enhanced pain. *Brain Behav*  
472 *Immun* 44:128–136. <https://doi.org/10.1016/j.bbi.2014.09.004>
- 473 29. Wiedermann CJ, Kiechl S, Dunzendorfer S, et al (1999) Association of endotoxemia  
474 with carotid atherosclerosis and cardiovascular disease: Prospective results from the  
475 Bruneck Study. *J Am Coll Cardiol* 34:1975–1981. [https://doi.org/10.1016/S0735-](https://doi.org/10.1016/S0735-1097(99)00448-9)  
476 1097(99)00448-9
- 477 30. Cani PD, Amar J, Iglesias MA, et al (2007) Metabolic endotoxemia initiates obesity and  
478 insulin resistance. *Diabetes* 56:1761–1772. <https://doi.org/10.2337/DB06-1491>
- 479 31. Brezzo G, Simpson J, Ameen-Ali KE, et al (2020) Acute effects of systemic  
480 inflammation upon the neuro-glial-vascular unit and cerebrovascular function. *Brain,*  
481 *Behav Immun - Heal* 5:100074. <https://doi.org/10.1016/j.bbih.2020.100074>
- 482 32. Schedlowski M, Engler H, Grigoleit JS (2014) Endotoxin-induced experimental systemic  
483 inflammation in humans: A model to disentangle immune-to-brain communication. *Brain*  
484 *Behav Immun* 35:1–8. <https://doi.org/10.1016/j.bbi.2013.09.015>
- 485 33. Liabeuf S, Glorieux G, Lenglet A, et al (2013) Does P-Cresylglucuronide Have the Same  
486 Impact on Mortality as Other Protein-Bound Uremic Toxins? *PLoS One* 8:.  
487 <https://doi.org/10.1371/journal.pone.0067168>
- 488 34. Itoh Y, Ezawa A, Kikuchi K, et al (2012) Protein-bound uremic toxins in hemodialysis  
489 patients measured by liquid chromatography/tandem mass spectrometry and their  
490 effects on endothelial ROS production. In: *Analytical and Bioanalytical Chemistry. Anal*  
491 *Bioanal Chem*, pp 1841–1850
- 492 35. Mutsaers HAM, Wilmer MJG, Reijnders D, et al (2013) Uremic toxins inhibit renal  
493 metabolic capacity through interference with glucuronidation and mitochondrial  
494 respiration. *Biochim Biophys Acta - Mol Basis Dis* 1832:142–150.  
495 <https://doi.org/10.1016/j.bbadis.2012.09.006>
- 496 36. Meert N, Schepers E, Glorieux G, et al (2012) Novel method for simultaneous

- 497 determination of p-cresylsulphate and p-cresylglucuronide: Clinical data and  
498 pathophysiological implications. *Nephrol Dial Transplant* 27:2388–2396.  
499 <https://doi.org/10.1093/ndt/gfr672>
- 500 37. Pletinck A, Glorieux G, Schepers E, et al (2013) Protein-bound uremic toxins stimulate  
501 crosstalk between leukocytes and vessel wall. *J Am Soc Nephrol* 24:1981–1994.  
502 <https://doi.org/10.1681/ASN.2012030281>
- 503 38. Sarnak MJ, Jaber BL (2000) Mortality caused by sepsis in patients with end-stage renal  
504 disease compared with the general population. *Kidney Int* 58:1758–1764.  
505 <https://doi.org/10.1111/J.1523-1755.2000.00337.X>
- 506 39. Ishigami J, Grams ME, Chang AR, et al (2017) CKD and Risk for Hospitalization With  
507 Infection: The Atherosclerosis Risk in Communities (ARIC) Study. *Am J Kidney Dis*  
508 69:752–761. <https://doi.org/10.1053/J.AJKD.2016.09.018>
- 509 40. Thompson S, James M, Wiebe N, et al (2015) Cause of Death in Patients with Reduced  
510 Kidney Function. *J Am Soc Nephrol* 26:2504–2511.  
511 <https://doi.org/10.1681/ASN.2014070714>
- 512 41. Espi M, Koppe L, Fouque D, Thaunat O (2020) Chronic kidney disease-associated  
513 immune dysfunctions: Impact of protein-bound uremic retention solutes on immune  
514 cells. *Toxins (Basel)* 12:300. <https://doi.org/10.3390/toxins12050300>
- 515 42. Yi D, Monteiro EB, Chambert S, et al (2018) Determination of the binding properties of  
516 p-cresyl glucuronide to human serum albumin. *Biochimie* 150:1–7.  
517 <https://doi.org/10.1016/j.biochi.2018.04.019>
- 518 43. Russell WR, Hoyles L, Flint HJ, Dumas M-E (2013) Colonic bacterial metabolites and  
519 human health. *Curr Opin Microbiol* 16:246–254.  
520 <https://doi.org/10.1016/j.mib.2013.07.002>
- 521 44. Wolter M, Grant ET, Boudaud M, et al (2021) Leveraging diet to engineer the gut  
522 microbiome. *Nat Rev Gastroenterol Hepatol* 18:885–902.  
523 <https://doi.org/10.1038/s41575-021-00512-7>
- 524 45. David LA, Maurice CF, Carmody RN, et al (2014) Diet rapidly and reproducibly alters  
525 the human gut microbiome. *Nature* 505:559–563. <https://doi.org/10.1038/nature12820>
- 526 46. Jackson PA, Pialoux V, Corbett D, et al (2016) Promoting brain health through exercise  
527 and diet in older adults: a physiological perspective. *J Physiol* 594:4485–4498.  
528 <https://doi.org/10.1113/JP271270>
- 529 47. Lamport DJ, Pal D, Macready AL, et al (2016) The effects of flavanone-rich citrus juice  
530 on cognitive function and cerebral blood flow: An acute, randomised, placebo-controlled  
531 cross-over trial in healthy, young adults. *Br J Nutr* 116:2160–2168.  
532 <https://doi.org/10.1017/S000711451600430X>
- 533 48. Liu R, Zhang TT, Zhou D, et al (2013) Quercetin protects against the A $\beta$ 25-35-induced

- 534 amnesic injury: Involvement of inactivation of RAGE-mediated pathway and  
535 conservation of the NVU. *Neuropharmacology* 67:419–431.  
536 <https://doi.org/10.1016/j.neuropharm.2012.11.018>
- 537 49. Schroeter H, Heiss C, Balzer J, et al (2006) (-)-Epicatechin mediates beneficial effects  
538 of flavanol-rich cocoa on vascular function in humans. *Proc Natl Acad Sci U S A*  
539 103:1024–1029. <https://doi.org/10.1073/pnas.0510168103>
- 540 50. Squadrito F, Altavilla D, Morabito N, et al (2002) The effect of the phytoestrogen  
541 genistein on plasma nitric oxide concentrations, endothelin-1 levels and endothelium  
542 dependent vasodilation in postmenopausal women. *Atherosclerosis* 163:339–347.  
543 [https://doi.org/10.1016/s0021-9150\(02\)00013-8](https://doi.org/10.1016/s0021-9150(02)00013-8)
- 544 51. Thaug Zaw JJ, Howe PRC, Wong RHX (2020) Sustained Cerebrovascular and  
545 Cognitive Benefits of Resveratrol in Postmenopausal Women. *Nutrients* 12:.  
546 <https://doi.org/10.3390/nu12030828>
- 547 52. Hong G, Yan Y, Zhong Y, et al (2019) Combined Ischemic Preconditioning and  
548 Resveratrol Improved Bloodbrain Barrier Breakdown via Hippo/YAP/TAZ Signaling  
549 Pathway. *CNS Neurol Disord - Drug Targets* 18:713–722.  
550 <https://doi.org/10.2174/1871527318666191021144126>
- 551 53. Liu R, Xinming Z, Jing Z, et al (2017) 3'-Daidzein sulfonate sodium inhibits neuronal  
552 apoptosis induced by cerebral ischemia-reperfusion. *Int J Mol Med* 39:1021–1028.  
553 <https://doi.org/10.3892/ijmm.2017.2915>
- 554 54. Jiang Z, Zhang J, Cai Y, et al (2017) Catechin attenuates traumatic brain injury-induced  
555 blood–brain barrier damage and improves longer-term neurological outcomes in rats.  
556 *Exp Physiol* 102:1269–1277. <https://doi.org/10.1113/EP086520>
- 557 55. Soltani Z, Khaksari M, Jafari E, et al (2015) Is genistein neuroprotective in traumatic  
558 brain injury? *Physiol Behav* 152:26–31. <https://doi.org/10.1016/j.physbeh.2015.08.037>
- 559 56. Manach C, Scalbert A, Morand C, et al (2004) Polyphenols: Food sources and  
560 bioavailability. *Am J Clin Nutr* 79:727–747. <https://doi.org/10.1093/ajcn/79.5.727>
- 561

**Table 1:** Significantly differentially expressed BBB-associated transporter genes following pCG treatment *in vivo*

| Gene           | Name                                                       | Saline       | pCG          | Direction | P <sub>FDR</sub>         |
|----------------|------------------------------------------------------------|--------------|--------------|-----------|--------------------------|
| <i>Ldlr</i>    | Low density lipoprotein receptor                           | 6.91 ± 0.32  | 8.67 ± 0.42  | Up        | 3.98 x 10 <sup>-11</sup> |
| <i>Abca2</i>   | ATP binding cassette subfamily A member 2                  | 10.49 ± 0.77 | 12.61 ± 0.42 | Up        | 1.15 x 10 <sup>-9</sup>  |
| <i>Slc2a1</i>  | Solute carrier family 2 member 1                           | 9.95 ± 0.48  | 11.66 ± 0.35 | Up        | 1.15 x 10 <sup>-9</sup>  |
| <i>Slc38a3</i> | Solute carrier family 38 member 3                          | 9.36 ± 0.47  | 10.84 ± 0.32 | Up        | 4.15 x 10 <sup>-8</sup>  |
| <i>Slc1a4</i>  | Solute carrier family 1 member 4                           | 9.28 ± 0.21  | 10.48 ± 0.28 | Up        | 6.98 x 10 <sup>-8</sup>  |
| <i>Slc7a5</i>  | Solute carrier family 7 member 5                           | 8.94 ± 0.6   | 10.55 ± 0.37 | Up        | 1.26 x 10 <sup>-7</sup>  |
| <i>Slc6a9</i>  | Solute carrier family 6 member 9                           | 8.40 ± 0.63  | 9.98 ± 0.32  | Up        | 1.92 x 10 <sup>-7</sup>  |
| <i>Slc7a1</i>  | Solute carrier family 7 member 1                           | 8.54 ± 0.34  | 9.75 ± 0.28  | Up        | 8.06 x 10 <sup>-7</sup>  |
| <i>Slc38a5</i> | Solute carrier family 38 member 5                          | 4.61 ± 0.5   | 6.42 ± 0.23  | Up        | 8.78 x 10 <sup>-7</sup>  |
| <i>Slc27a4</i> | Solute carrier family 27 member 4                          | 9.73 ± 0.27  | 10.88 ± 0.31 | Up        | 1.10 x 10 <sup>-6</sup>  |
| <i>Slc16a2</i> | Solute carrier family 16 member 2                          | 8.35 ± 0.34  | 9.62 ± 0.44  | Up        | 1.30 x 10 <sup>-6</sup>  |
| <i>Slc22a8</i> | Solute carrier family 22 member 8                          | 7.65 ± 0.37  | 8.77 ± 0.21  | Up        | 7.13 x 10 <sup>-6</sup>  |
| <i>Slc29a4</i> | Solute carrier family 29 member 4                          | 7.01 ± 0.73  | 8.50 ± 0.45  | Up        | 2.09 x 10 <sup>-5</sup>  |
| <i>Mfsd2a</i>  | Major facilitator superfamily domain containing 2A         | 8.51 ± 0.48  | 9.57 ± 0.21  | Up        | 9.88 x 10 <sup>-5</sup>  |
| <i>Slc38a1</i> | Solute carrier family 38 member 1                          | 10.63 ± 0.27 | 11.46 ± 0.11 | Up        | 1.60 x 10 <sup>-4</sup>  |
| <i>Abcc4</i>   | ATP binding cassette subfamily C member 4                  | 7.20 ± 0.31  | 8.20 ± 0.49  | Up        | 3.25 x 10 <sup>-4</sup>  |
| <i>Slco2b1</i> | Solute carrier organic anion transporter family member 2B1 | 7.93 ± 0.62  | 9.02 ± 0.22  | Up        | 3.28 x 10 <sup>-4</sup>  |
| <i>Slc27a1</i> | Solute carrier family 27 member 1                          | 9.77 ± 0.53  | 10.74 ± 0.15 | Up        | 5.02 x 10 <sup>-4</sup>  |
| <i>Abcc1</i>   | ATP binding cassette subfamily C member 1                  | 8.00 ± 0.44  | 8.90 ± 0.25  | Up        | 8.66 x 10 <sup>-4</sup>  |
| <i>Slc5a6</i>  | Solute carrier family 5 member 6                           | 8.21 ± 0.33  | 8.94 ± 0.23  | Up        | 3.12 x 10 <sup>-3</sup>  |

|                |                                                           |              |              |      |                         |
|----------------|-----------------------------------------------------------|--------------|--------------|------|-------------------------|
| <i>Slc1a5</i>  | Solute carrier family 1 member 5                          | 5.11 ± 0.36  | 6.15 ± 0.11  | Up   | 3.27 x 10 <sup>-3</sup> |
| <i>Slc29a1</i> | Solute carrier family 29 member 1 (Augustine blood group) | 7.76 ± 0.35  | 8.45 ± 0.08  | Up   | 4.39 x 10 <sup>-3</sup> |
| <i>Slc6a6</i>  | Solute carrier family 6 member 6                          | 10.48 ± 0.58 | 11.31 ± 0.15 | Up   | 6.05 x 10 <sup>-3</sup> |
| <i>Slc1a1</i>  | Solute carrier family 1 member 1                          | 10.59 ± 0.31 | 11.13 ± 0.13 | Up   | 2.41 x 10 <sup>-2</sup> |
| <i>Slc44a1</i> | Solute carrier family 44 member 1                         | 9.99 ± 0.2   | 10.44 ± 0.23 | Up   | 4.07 x 10 <sup>-2</sup> |
| <i>Slc5a3</i>  | Solute carrier family 5 member 3                          | 9.50 ± 0.4   | 8.55 ± 0.37  | Down | 2.99 x 10 <sup>-4</sup> |
| <i>Tfrc</i>    | Transferrin receptor                                      | 11.39 ± 0.29 | 10.63 ± 0.25 | Down | 1.29 x 10 <sup>-3</sup> |
| <i>Aqp4</i>    | Aquaporin 4                                               | 11.83 ± 0.32 | 10.98 ± 0.51 | Down | 3.58 x 10 <sup>-3</sup> |

561 **Figure Legends**

562

563 **Figure 1: Production and validation of pCG. A)** Schematic synthetic pathway for the  
564 production of pCG, as previously reported [22]. **B)** Typical [<sup>1</sup>H]-NMR spectroscopy trace  
565 indicating microanalytical purity of *de novo* synthesised pCG.

566

567 **Figure 2: pCG treatment alters murine BBB permeability and CNS transcriptional profile**

568 ***in vivo*. A)** Treatment of male C57Bl/6 mice by i.p. injection of pCG (1 mg/kg) caused a time-  
569 dependent reduction in extravasation of Evans blue tracer into the CNS parenchyma, reaching  
570 statistical significance 6 h post administration; data are mean  $\pm$  s.e.m. n=6. **B)** Heatmap  
571 showing expression of the 7702 genes found to be significantly ( $P_{FDR}<0.05$ ) differentially  
572 expressed in the CNS of male C57Bl/6 mice 2 h following i.p. injection of 1 mg/kg pCG (n=3  
573 per group). **C)** Volcano plot showing 3091 significantly ( $P_{FDR}< 0.05$ ) 2-fold differentially  
574 expressed genes (red dots). **D)** Biological processes associated with genes found to be  
575 significantly and  $\geq 2$ -fold upregulated (n=1433) or downregulated (n=1658) upon exposure of  
576 mice to pCG. Images are based on Enrichr P value ranking from GO analysis, the lighter the  
577 colour and longer the bar, the more is significant is the result, as determined by rank-based  
578 ranking; only the top 10 results are shown in each case. **E)** Volcano plot showing significantly  
579 ( $P_{FDR}< 0.05$ ) differentially expressed BBB-relevant genes (red dots). **F)** Biological processes  
580 associated with BBB-relevant genes found to be significantly upregulated (n=78) or  
581 downregulated (n=24) upon exposure of mice to pCG. Images are based on Enrichr P value  
582 ranking from GO analysis, the lighter the colour and longer the bar, the more is significant is  
583 the result, as determined by rank-based ranking; only the top 10 results are shown in each  
584 case.

585

586 **Figure 3: Limited effects of pCG upon unstimulated *in vitro* models of the BBB. A)**

587 Treatment of hCMEC/D3 cells with increasing doses of pCG (0.1 – 100  $\mu$ M; 24 h) has no effect  
588 on cell survival or proliferation as measured by the MTT assay, in contrast to the highly toxic  
589 effects of 0.03% H<sub>2</sub>O<sub>2</sub> exposure; data are mean  $\pm$  s.e.m., n=4. **B)** Trans-endothelial electrical  
590 resistance across polarised hCMEC/D3 monolayers following 24 h treatment with pCG; data  
591 are mean  $\pm$  s.e.m., n=6. **C)** Paracellular permeability of polarised hCMEC/D3 monolayers to a  
592 70 kDa FITC-dextran tracer following 24 h treatment with pCG; data are mean  $\pm$  s.e.m., n=9.  
593 **D)** Confocal microscopic analysis of expression of the tight junction component zona  
594 occludens-1 (ZO-1) or AF488-phalloidin labelled actin filaments in hCMEC/D3 cells following  
595 treatment for 24 h with 1  $\mu$ M pCG. Images are representative of at least three independent  
596 experiments. **E)** Treatment of hCMEC/D3 cells with pCG (24 h) had no effect on cell surface

597 expression of P-glycoprotein, data are mean  $\pm$  s.e.m. n=6. **F, G**) Lack of stimulatory (F) or  
598 inhibitory (G) effects of pCG upon baseline or stimulated P-glycoprotein activity, data are mean  
599  $\pm$  s.e.m., n=4. **H**) Treatment of hCMEC/D3 cells with pCG (24 h) caused a slight but significant  
600 reduction in BCRP expression at the highest dose tested (100  $\mu$ M), data are mean  $\pm$  s.e.m.,  
601 n=6. **I-J**) Lack of stimulatory (I) or inhibitory (J) effects of pCG upon baseline or stimulated P-  
602 glycoprotein activity, data are mean  $\pm$  s.e.m., n=4.

603

604 **Figure 4: Treatment with pCG antagonises the effects of LPS *in vitro*.** **A**) Paracellular  
605 permeability of polarised hCMEC/D3 monolayers to a 70 kDa FITC-dextran tracer with or  
606 without 24 h treatment with *Porphyromonas gingivalis* LPS (10 ng/ml) under control conditions  
607 or with 30 minutes pre-treatment with 1  $\mu$ M pCG; data are mean  $\pm$  s.e.m., n=6. **B**)  
608 Transendothelial electrical resistance of polarised hCMEC/D3 monolayers to a 70 kDa FITC-  
609 dextran tracer with or without 24 h treatment with *P. gingivalis* LPS (10 ng/ml) under control  
610 conditions or with 30 minutes pre-treatment with 1  $\mu$ M pCG; data are mean  $\pm$  s.e.m., n=6. **C**)  
611 Confocal microscopic analysis of expression of the tight junction component zona occludens-  
612 1 (ZO-1) in hCMEC/D3 cells following treatment for 24 h with 10 ng/ml LPS with or without 30  
613 minutes prior administration of 1  $\mu$ M pCG. Images are representative of at least three  
614 independent experiments. **D**) Confocal microscopic analysis of AF488-phalloidin defined actin  
615 filaments in hCMEC/D3 cells following treatment for 24 h with 10 ng/ml LPS with or without 30  
616 minutes prior administration of 1  $\mu$ M pCG. Images are representative of at least three  
617 independent experiments. **E**) Treatment of hCMEC/D3 cells with pCG (1 – 100  $\mu$ M, 24 h) has  
618 no effect on surface expression of TLR4; data are mean  $\pm$  s.e.m., n=6. **F**) Treatment of  
619 hCMEC/D3 cells with pCG (1 – 100  $\mu$ M, 24 h) has no effect on surface expression of CD14;  
620 data are mean  $\pm$  s.e.m., n=6. **G**) Treatment of hCMEC/D3 cells with pCG (1 – 100  $\mu$ M, 24 h)  
621 has no effect on surface expression of MD-2; data are mean  $\pm$  s.e.m., n=6. **H**) Pre-treatment  
622 for 30 minutes with pCG (1  $\mu$ M) prevents the increase in cell surface CD11b expression on  
623 THP-1 monocyte-like cells induced by 24 h treatment with LPS (20 ng/ml); data are mean  $\pm$   
624 s.e.m., n=4.

625

626 **Supplemental Figure 1: Treatment with *p*-cresol impairs endothelial barrier integrity *in***  
627 ***vitro*.** **A**) Paracellular permeability of polarised hCMEC/D3 monolayers to a 70 kDa FITC-  
628 dextran tracer following 24 h treatment with *p*-cresol (5  $\mu$ M); data are mean  $\pm$  s.e.m., n=6. **B**)  
629 Trans-endothelial electrical resistance across polarised hCMEC/D3 monolayers following 24  
630 h treatment with *p*-cresol (5  $\mu$ M); data are mean  $\pm$  s.e.m., n=6.

631



632 **Supplemental Figure 2: Signaling pathway impact analysis (SPIA) for gene expression**  
633 **in mouse brain cells following pCG treatment. A)** SPIA results for all 7702 differentially  
634 expressed genes or for the 102 BBB-relevant differentially expressed genes in the CNS of  
635 male C57Bl/6 mice 2 h following i.p. injection of 1 mg/kg pCG (n=3 per group). The pathways  
636 in red to the right of the thick red line are significant after FWER correction of the global *P*  
637 values (pG, obtained by combining the pPERT and pNDE using Fisher's method). The  
638 pathways in blue to the right of the thick blue line are significant after FDR correction of the  
639 pG values. Numerical labels refer to the KEGG pathway. **B)** Summary of above SPIA results,  
640 indicating which KEGG pathways were activated (red) or inhibited (blue).

641

642 **Supplemental Figure 3: Expression of TLR4, MD-2 and CD14 by hCMEC/D3 cells.** Typical  
643 flow cytometry histogram profiles of hCMEC/D3 cells immunolabelled with **A)** PE-conjugated  
644 anti-TLR4, **B)** FITC-conjugated anti-MD-2, or **C)** FITC-conjugated anti-CD14 antibodies.

645

646 **Supplemental Figure 4: Exposure of THP-1 cells to LPS dose-dependently increases**  
647 **cell surface CD11b expression. A)** Typical histograms showing a dose-dependent increase  
648 in CD11b fluorescence intensity. **B)** Median fluorescence intensities of THP-cell surface  
649 CD11b expression in THP-1 cells treated for 24 h with different doses of *Porphyromonas*  
650 *gingivalis* LPS; data are mean  $\pm$  s.e.m., n=3, \**P*<0.05 vs. untreated cells.

651

Figure 1: Synthesis of p-cresol glucuronide

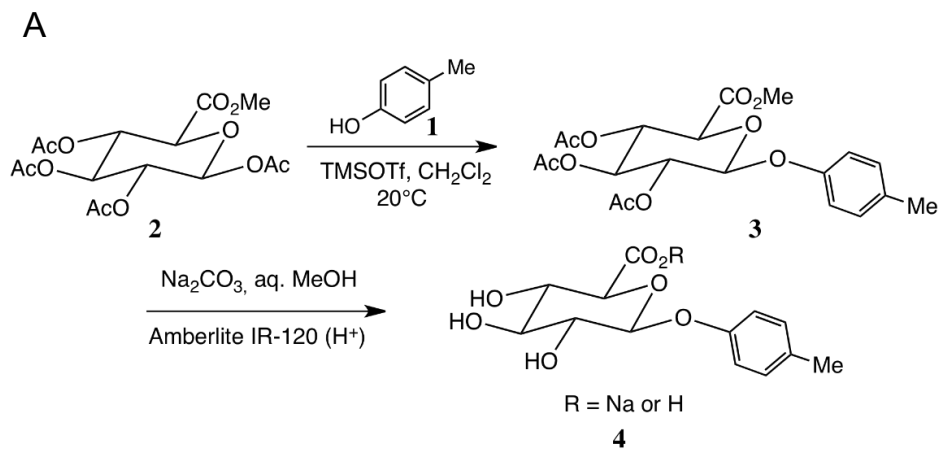

**B**

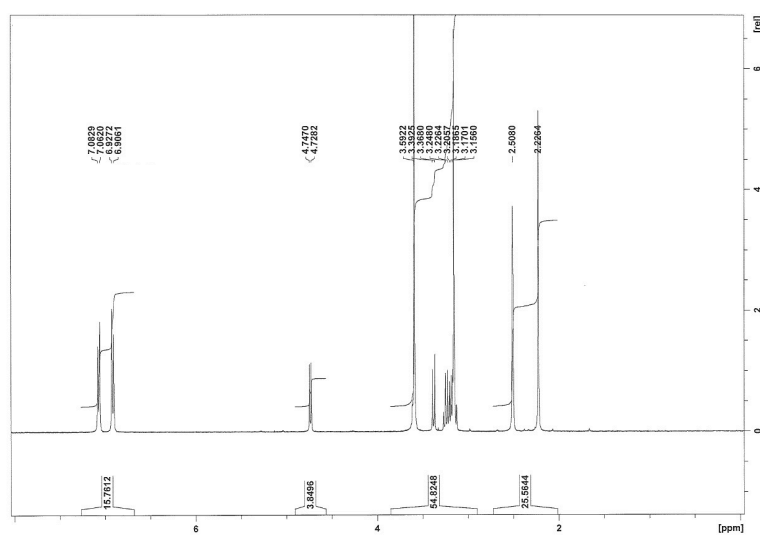

Figure 2: Activity of p-cresol glucuronide upon the CNS *in vivo*

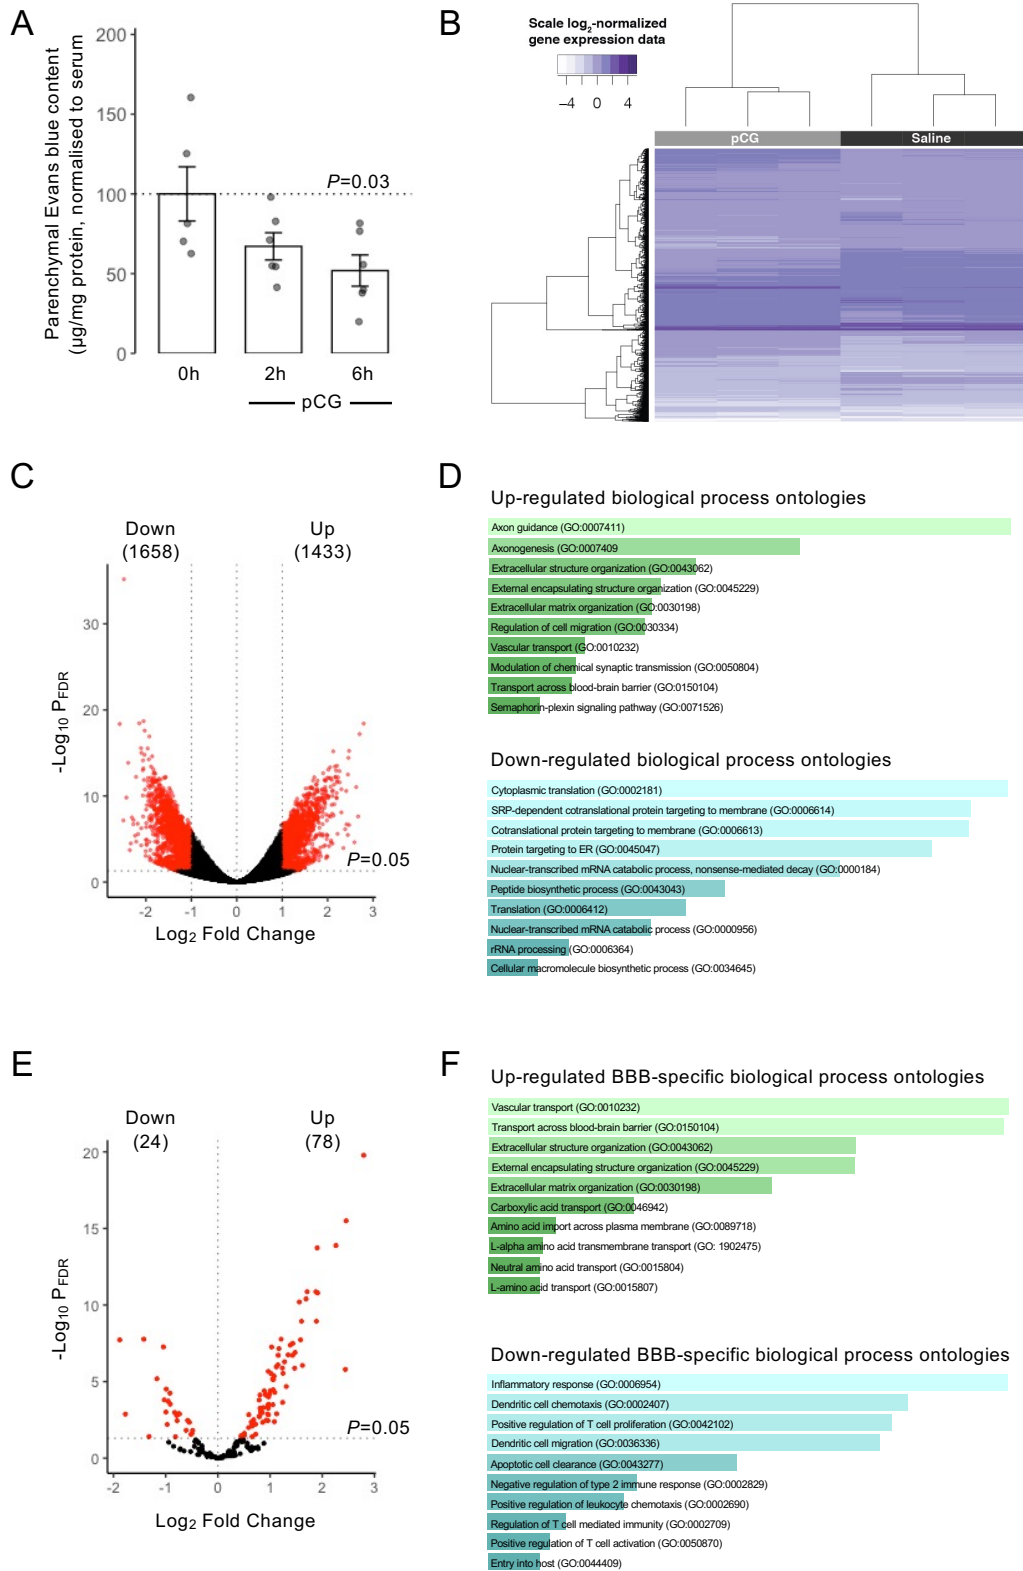

Figure 3: Limited effects of p-cresol glucuronide upon the unstimulated BBB *in vitro*

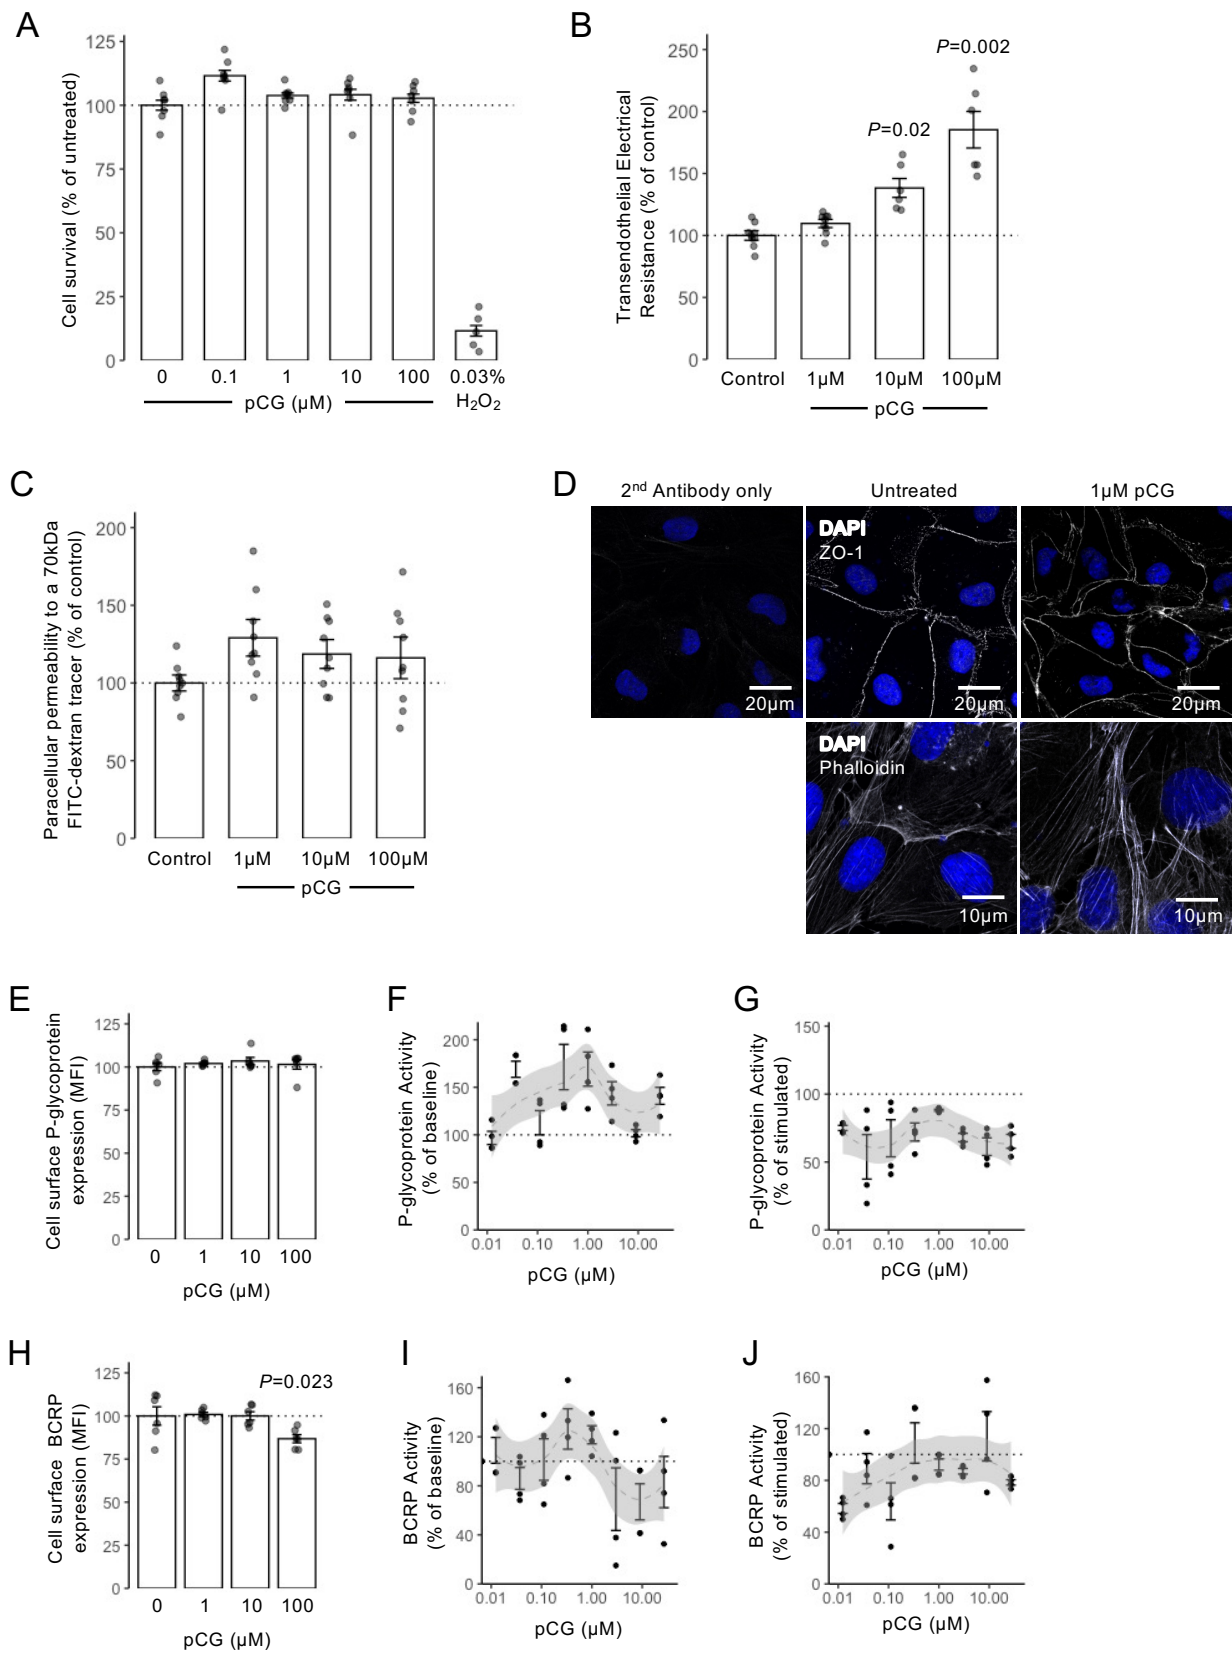

Figure 4: p-cresol glucuronide antagonises the effects of LPS *in vitro*

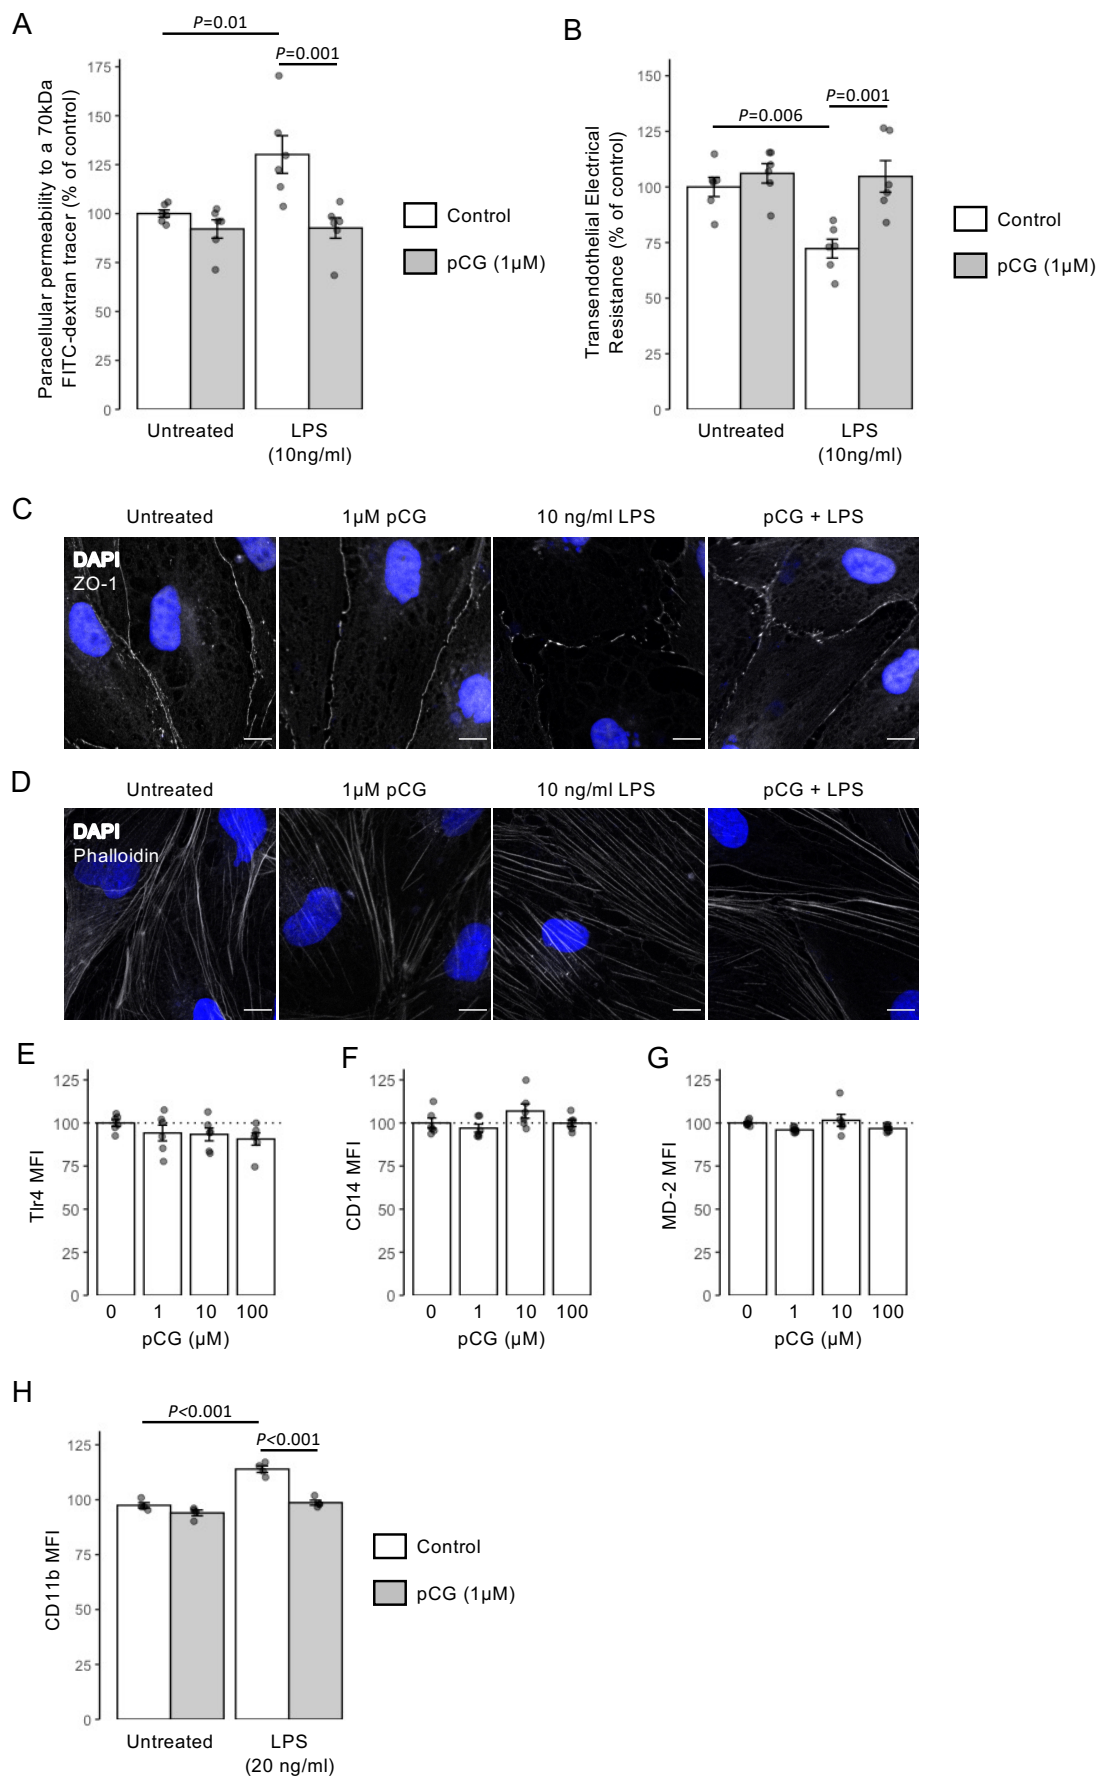

Supplemental Figure 1

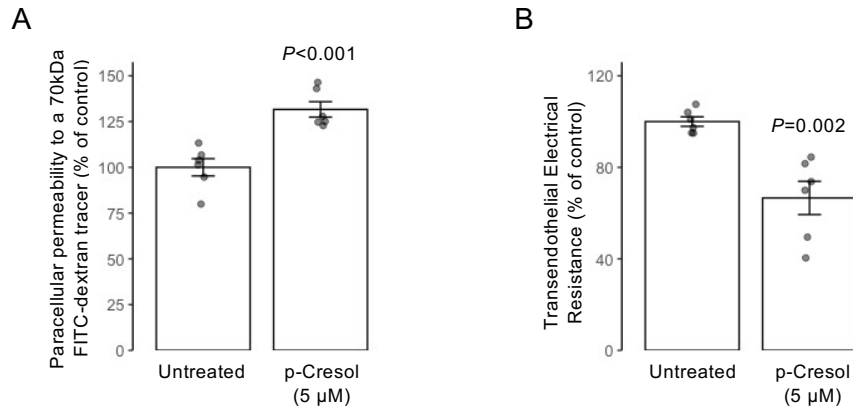





Supplemental Figure 3

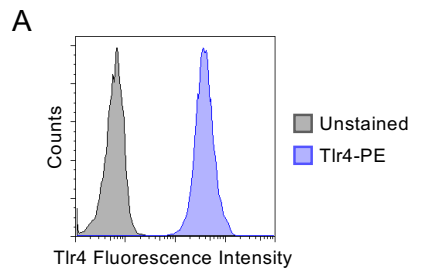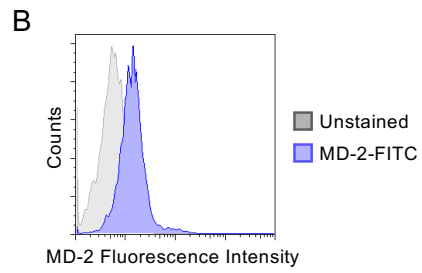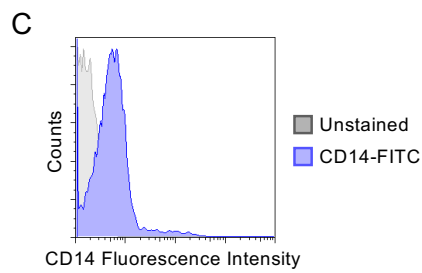

Supplemental Figure 4

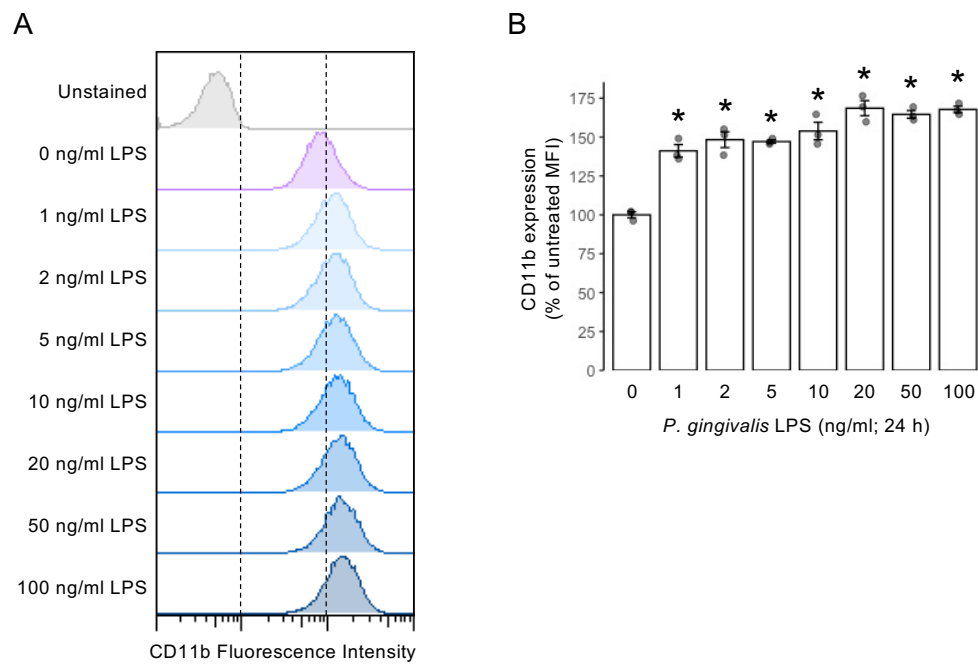

Source: https://www.biorxiv.org/content/10.1101/2022.01.11.475932v1.full.pdf
